# Supplementary material for: Effectiveness of the Stand More AT (SMArT) Work intervention: cluster randomised controlled trial
Source: PubMed Central journal article supplement (PMC6174726; doi:10.1136/bmj.k3870), 2018-10-10

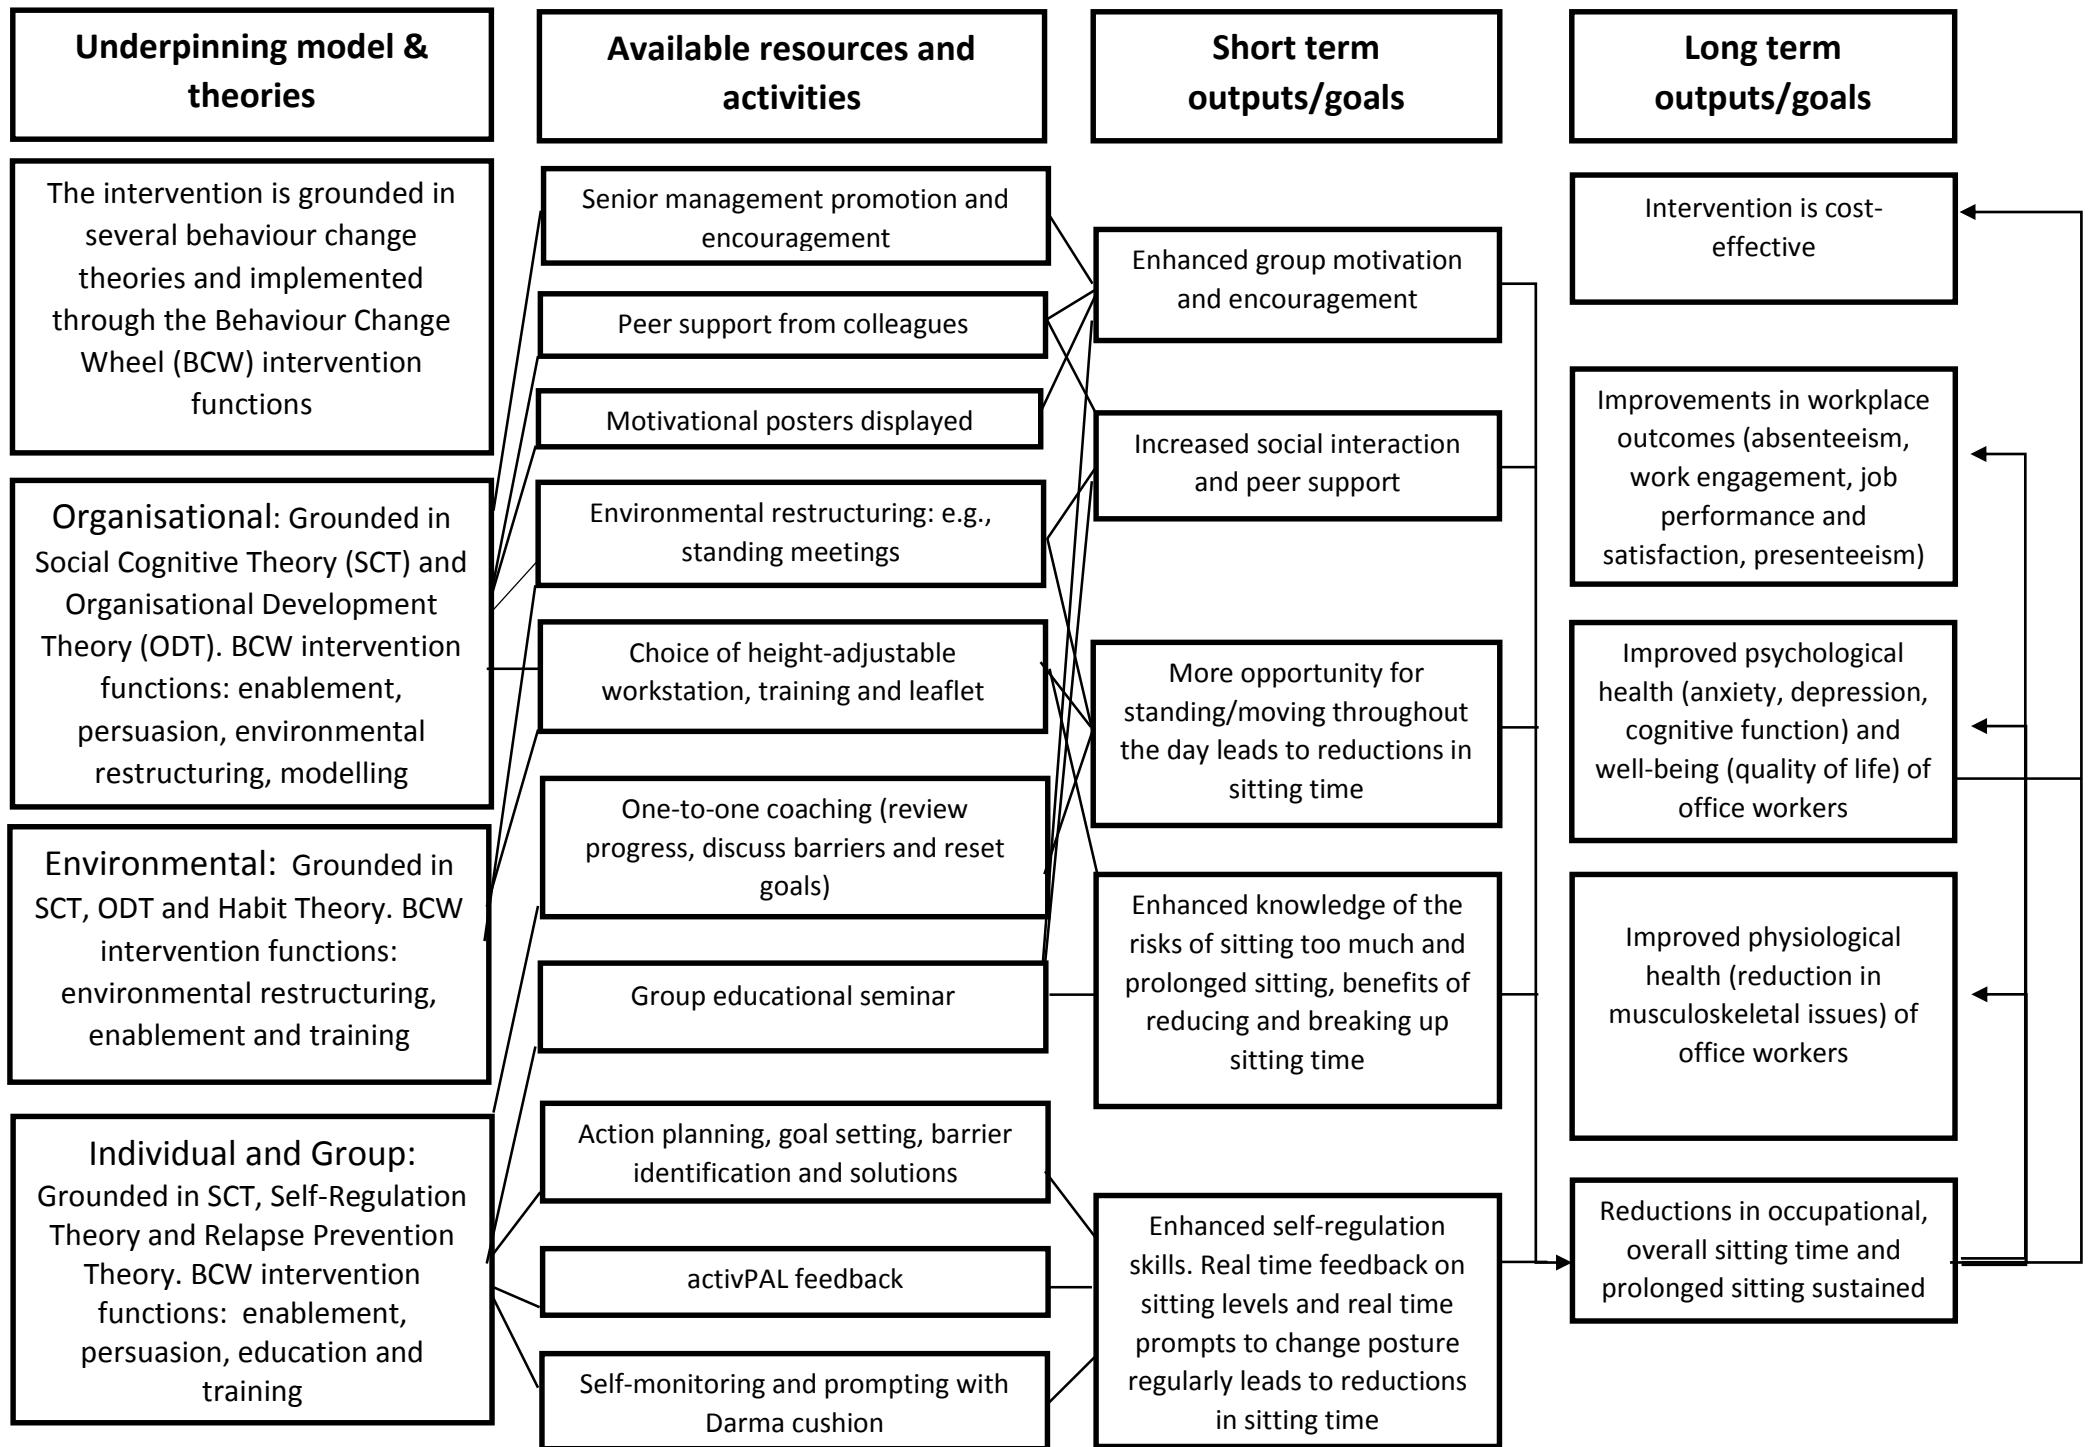

Supplement: edwc044237.wf1.pdf [file edwc044237.wf1.pdf]
